# Supplementary material for: A tactical nanomissile mobilizing antitumor immunity enables neoadjuvant chemo-immunotherapy to minimize postsurgical tumor metastasis and recurrence
Source: PubMed Central journal article supplement — Acta Pharm Sin B. 2022 Sep 30;13(2):804–18. doi: 10.1016/j.apsb.2022.09.017 (PMC9979264; doi:10.1016/j.apsb.2022.09.017), 2022-09-30
Supplement: mmc1.pdf [file mmc1.pdf]

**Supporting Information for**

**ORIGINAL ARTICLE**

**A tactical nanomissile mobilizing antitumor immunity enables  
neoadjuvant chemo-immunotherapy to minimize postsurgical tumor  
metastasis and recurrence**

Tao He, Mingxing Hu, Shunyao Zhu, Meiling Shen, Xiaorong Kou, Xiuqi Liang, Lu Li, Xinchao Li,  
Miaomiao Zhang, Qinjie Wu\*, Changyang Gong\*

*State Key Laboratory of Biotherapy and Cancer Center, West China Hospital, Sichuan University,  
Chengdu, 610041, China*

Received 6 April 2022; received in revised form 7 Jun 2022; accepted 19 Jun 2022

\*Corresponding authors. Tel./fax: +86 13541158521 (Changyang Gong), +86 13402823774 (Qinjie Wu).

E-mail addresses: chygong14@163.com (Changyang Gong), cellwqj@163.com (Qinjie Wu).

**Table S1** List of antibodies applied to flow cytometric analysis.

| Antibody           | Clone   | Fluorophore      | Source      |
|--------------------|---------|------------------|-------------|
| CD3                | 17A2    | PE/Cyanine 7     | Biolegend   |
| CD4                | GK1.5   | PE               | Biolegend   |
| CD4                | GK1.5   | FITC             | Biolegend   |
| CD8 $\alpha$       | 53-6.7  | FITC             | Biolegend   |
| CD8 $\alpha$       | 53-6.7  | PE/Cyanine 7     | Biolegend   |
| CD11c              | N418    | PE               | Biolegend   |
| LRP1               | EPR3724 | Alexa Fluor® 488 | Abcam       |
| CD103              | 2E7     | APC              | Biolegend   |
| CD4                | RM4-5   | FITC             | eBioscience |
| CD25               | PC61.5  | PE               | eBioscience |
| Foxp3              | FJK-16s | PE/Cyanine 5     | eBioscience |
| CD16/32 (Fc Block) | 93      | --               | eBioscience |
| CD44               | IM7     | PE               | Biolegend   |
| CD62L              | MEL-14  | APC              | Biolegend   |
| HMGB1              | --      | FITC             | Bioss       |

**Table S2** Preparation of MAL with different AZO molar ratios.

|                         | Ratio 1 |       | Ratio 2 |      | Ratio 3 |       | Ratio 4 |      | Ratio 5 |      |
|-------------------------|---------|-------|---------|------|---------|-------|---------|------|---------|------|
| AZO                     | 50%     |       | 60%     |      | 70%     |       | 80%     |      | 90%     |      |
| Cholesterol             | 45%     |       | 35%     |      | 25%     |       | 15%     |      | 5%      |      |
| DSPE-mPEG <sub>2k</sub> | 5%      |       | 5%      |      | 5%      |       | 5%      |      | 5%      |      |
| EE (%)                  | 76.9    |       | 64.4    |      | 48.4    |       | 14.0    |      | 7.8     |      |
| DL (%)                  | 8.0     |       | 7.3     |      | 4.9     |       | 1.2     |      | 0.9     |      |
| Days                    | 0       | 7     | 0       | 7    | 0       | 7     | 0       | 7    | 0       | 7    |
| Size (nm)               | 92.4    | 114.3 | 91.2    | 94.5 | 94.6    | 129.5 | 90.6    | 85.1 | 47.2    | 48.7 |
| PDI                     | 0.05    | 0.24  | 0.08    | 0.10 | 0.09    | 0.24  | 0.17    | 0.20 | 0.24    | 0.32 |

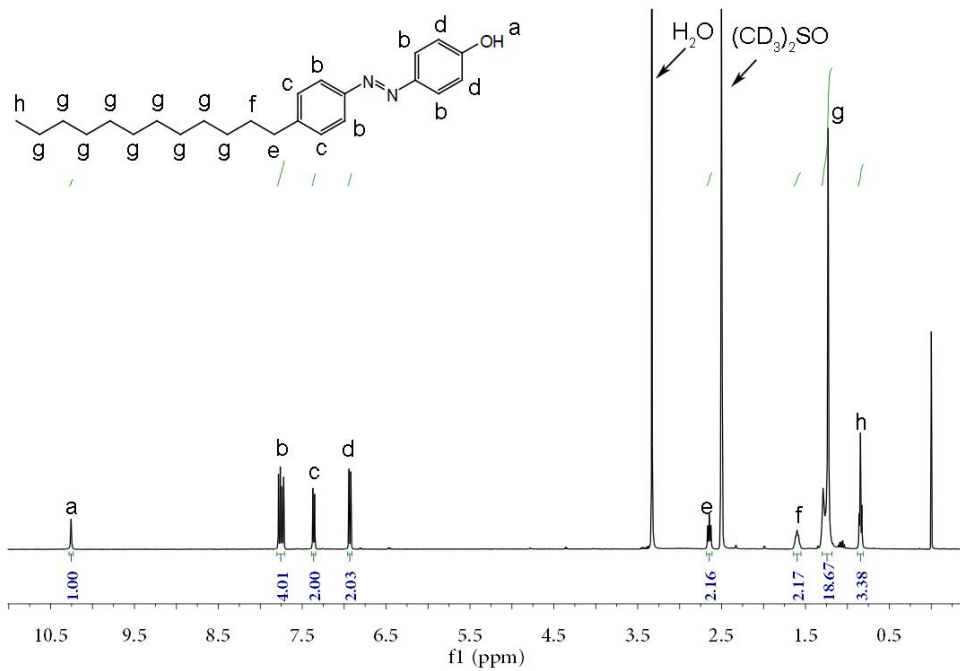

**Figure S1**  $^1\text{H}$  NMR spectra of compound A.

**Figure S2**  $^1\text{H}$  NMR spectra of compound B.

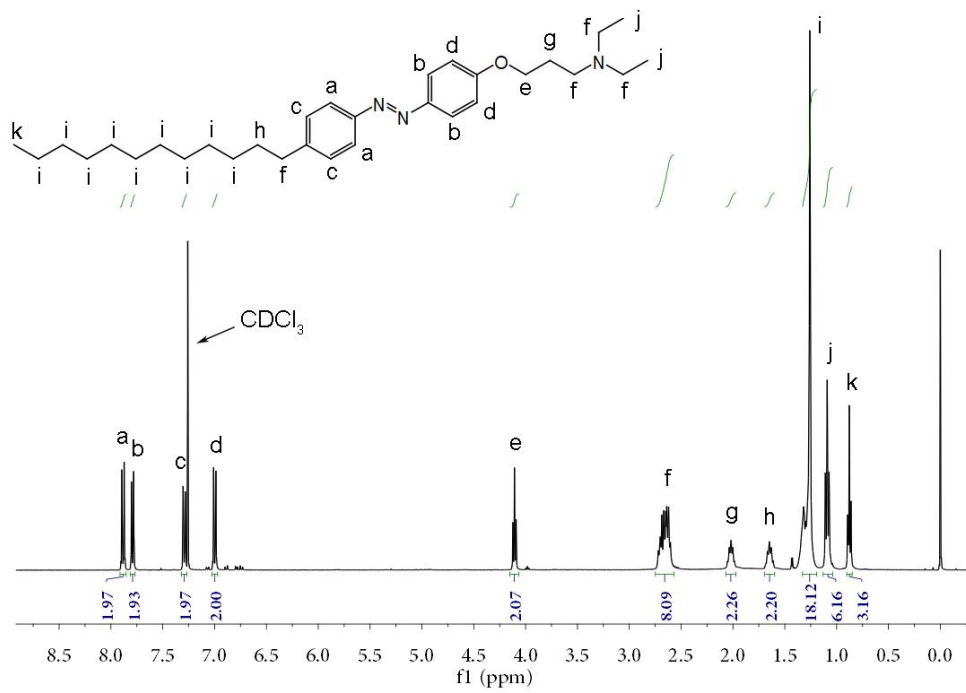

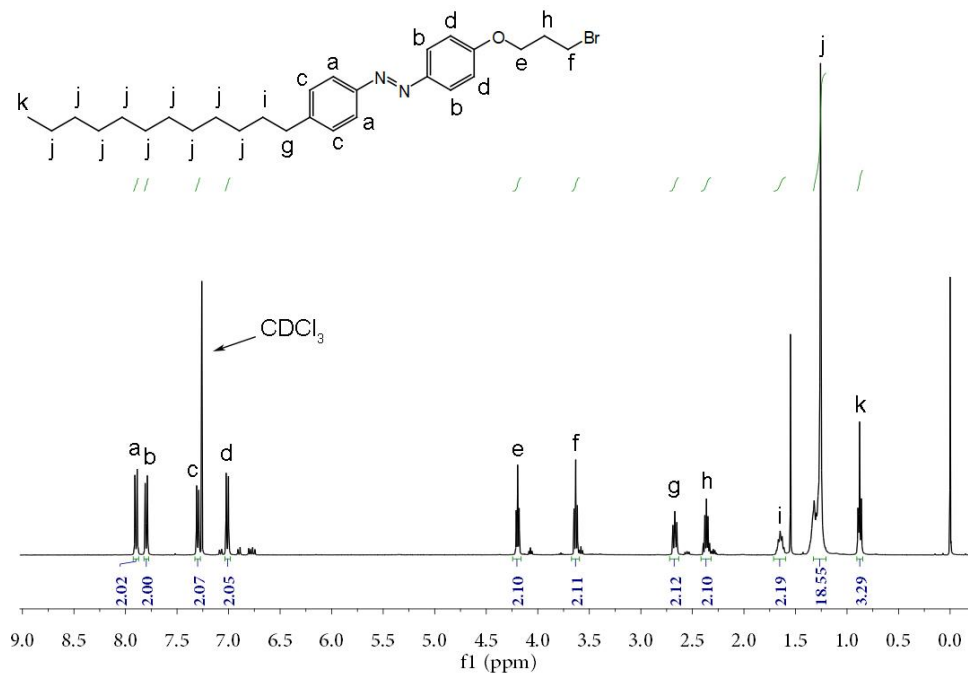

Figure S3  $^1\text{H}$  NMR spectra of AZO.

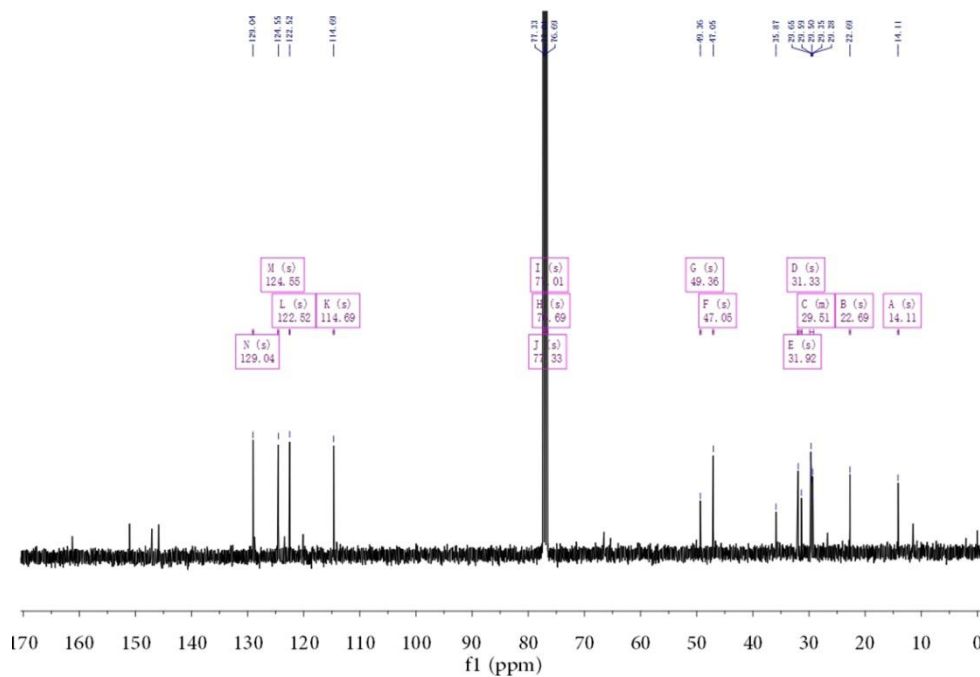

Figure S4  $^{13}\text{C}$  NMR spectra of AZO.

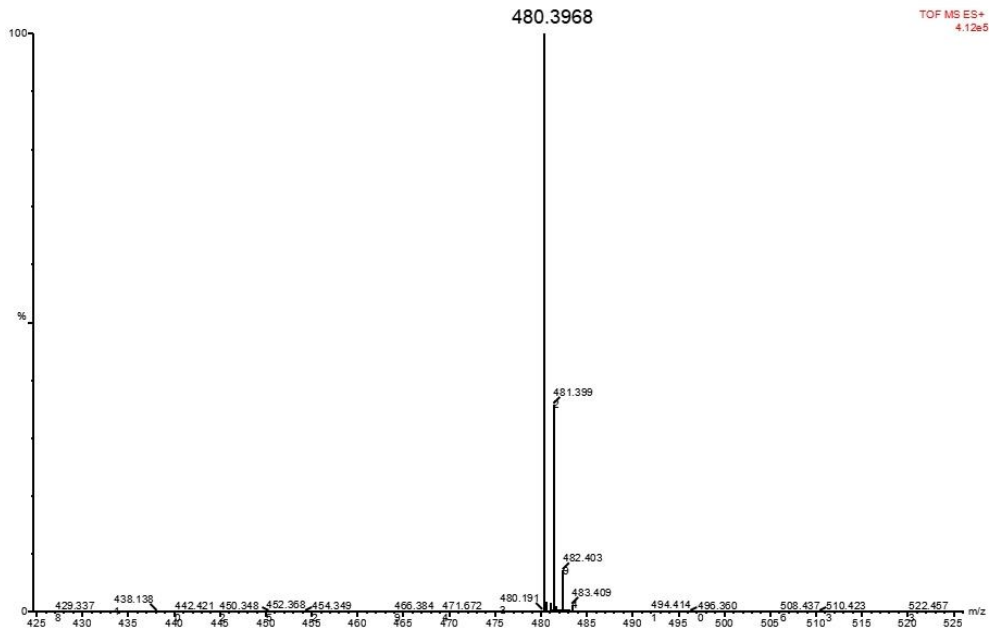

**Figure S5** ESI-MS spectra of AZO.

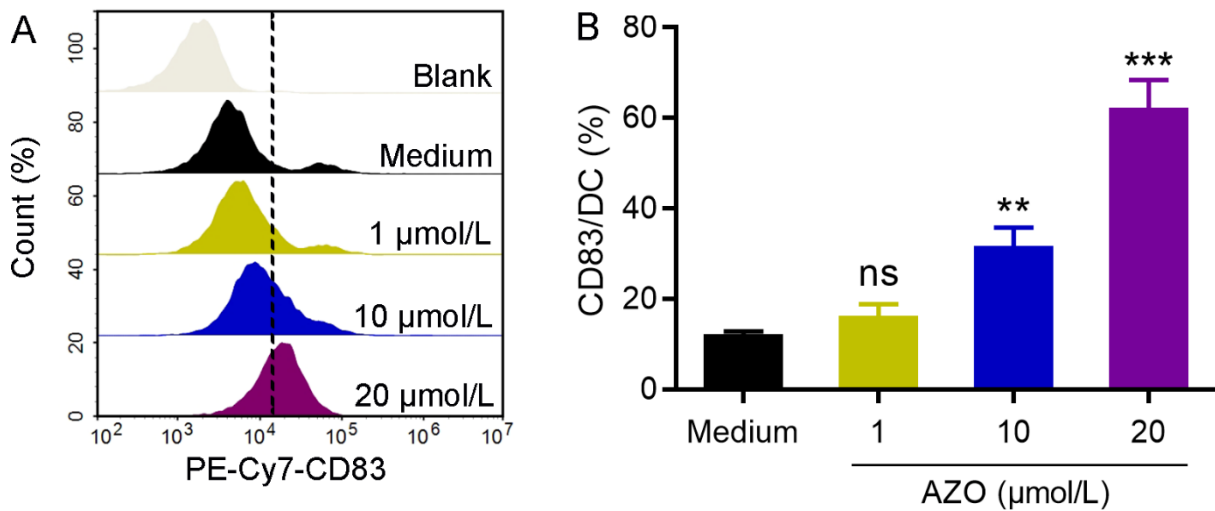

**Figure S6** Flow histogram (A) and statistical analysis (B) of CD83<sup>+</sup> cells. Data are presented as mean±SD ( $n = 3$ ). \*\*\* $P < 0.001$ , \*\* $P < 0.01$  indicate the statistical difference between each group and the Medium group, ns: not significant.

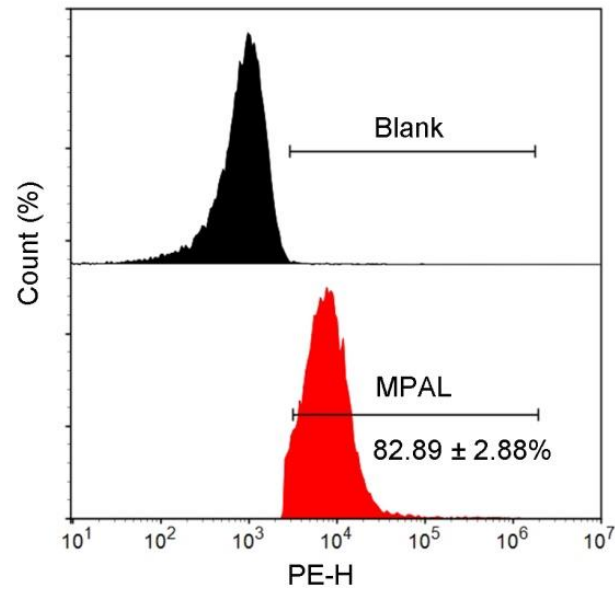

**Figure S7** Flow cytometric examination of the insertion efficiency of aPD-L1 on MPAL.

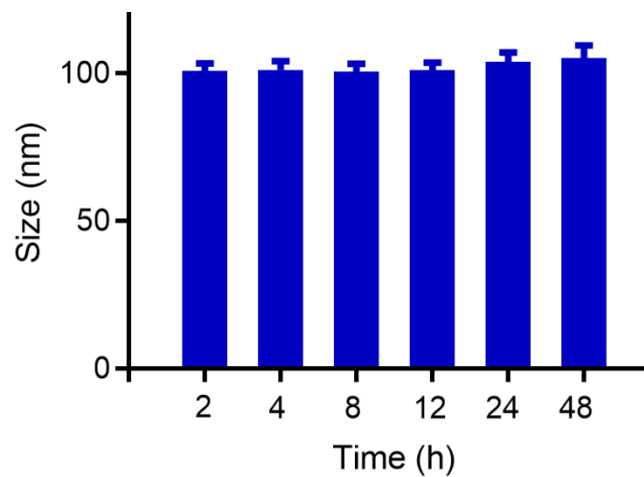

**Figure S8** Size change of MPAL incubated in 50% FBS for 48 h. Data are presented as mean±SD ( $n = 3$ ).

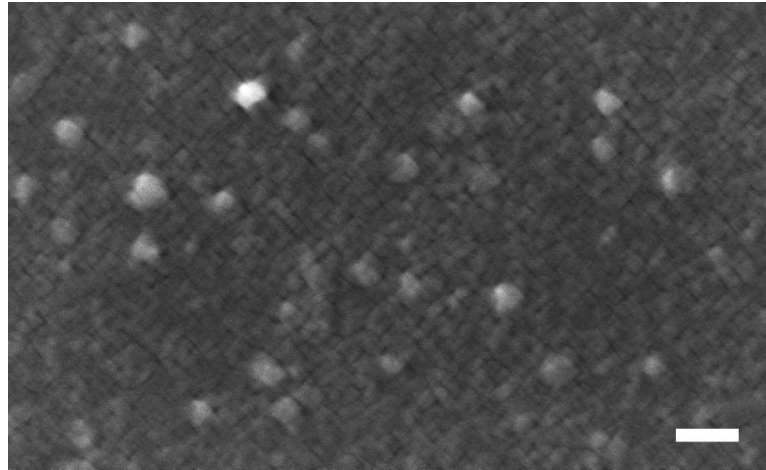

**Figure S9** The FESEM image of MPAL (Scale bar: 200 nm).

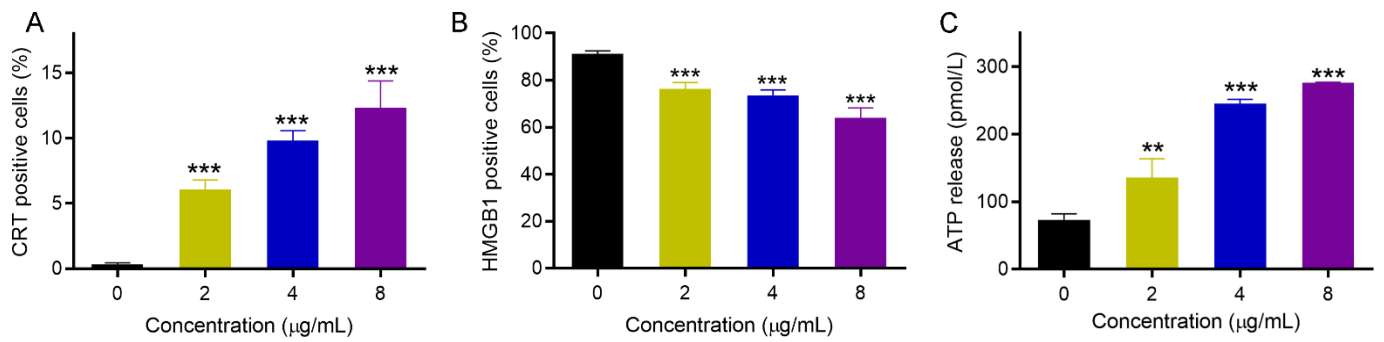

**Figure S10** MPAL elicited the immunogenic death of B16-F10 cells. (A) CRT detections on B16-F10 cells after treated with different concentrations of MPAL using flow cytometry. (B) HMGB1 detections in B16-F10 cells after treated with different concentrations of MPAL using flow cytometry. (C) ATP production by B16-F10 cells after MPAL treatment. Data are presented as mean±SD (n = 3). \*\*\* $P < 0.001$  and \*\* $P < 0.01$  indicate the statistical difference between each group and the group without MPAL.



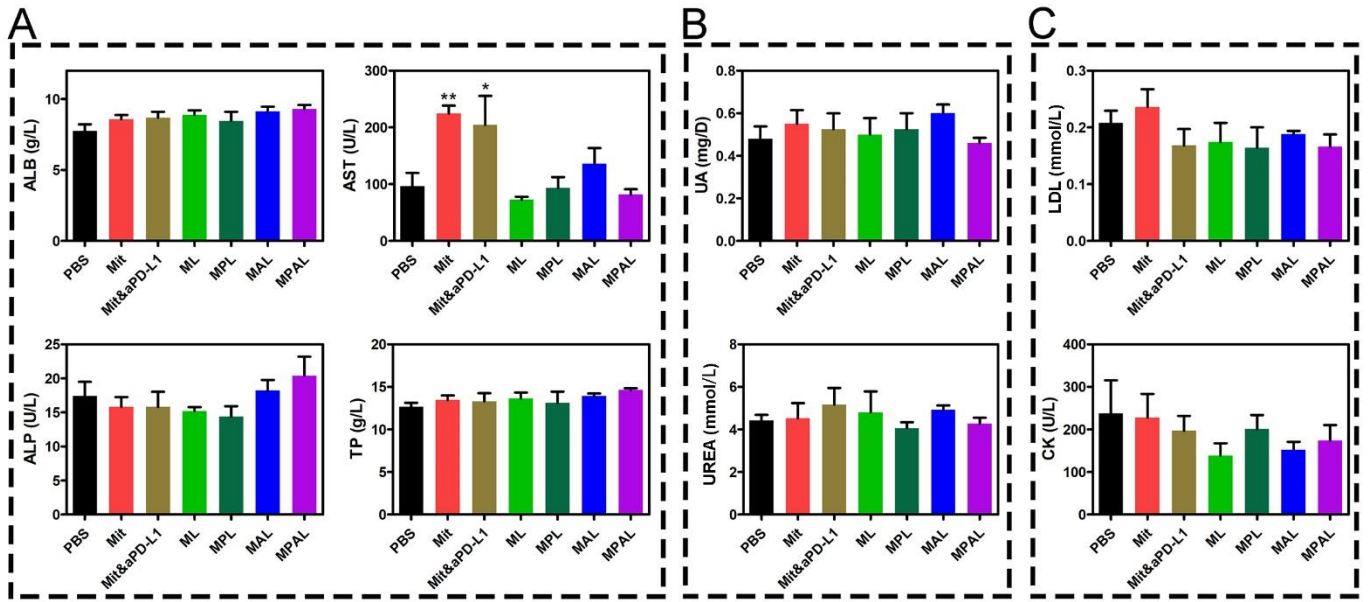

**Figure S11** Blood chemistry profile of (A) liver, (B) kidney, and (C) heart functions-related indexes of mice in each group after treatment. Data are presented as mean±SD (n=3). \* $P < 0.05$  and \*\* $P < 0.01$  indicate the statistical difference between each group and the PBS group.

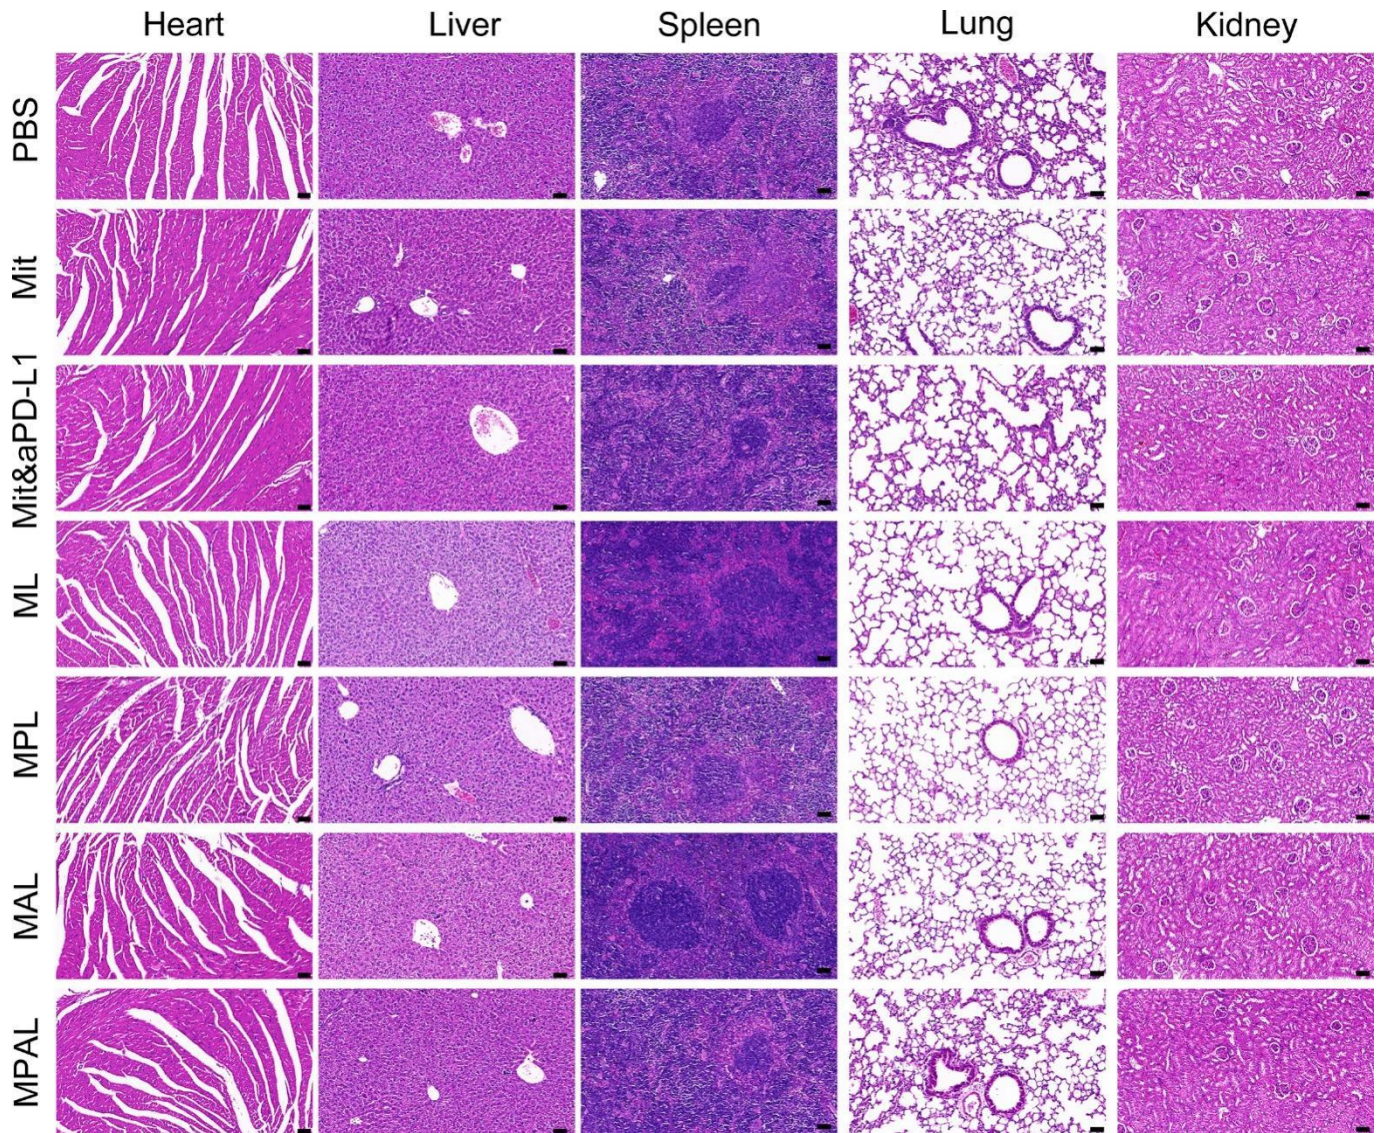

**Figure S12** H&E staining of major organs in B16-F10 subcutaneous xenograft model after different treatments. (Scale bar: 50  $\mu$ m).

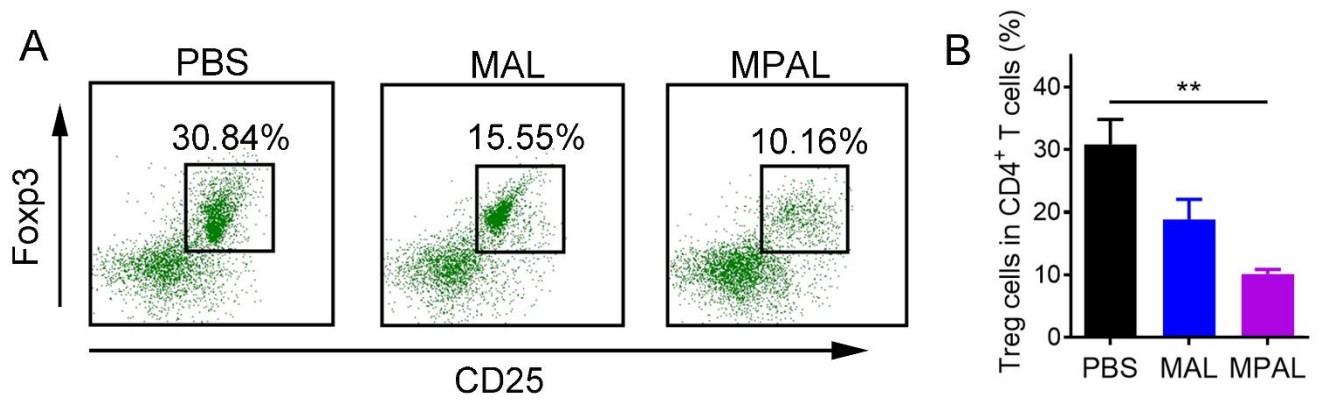

**Figure S13** Flow scatter diagram of Treg (CD3<sup>+</sup>CD4<sup>+</sup>CD25<sup>+</sup>Foxp3<sup>+</sup>) (A) and its statistical analysis (B) in tumors. Data are presented as mean±SD (*n* = 3). \*\**P*<0.01.

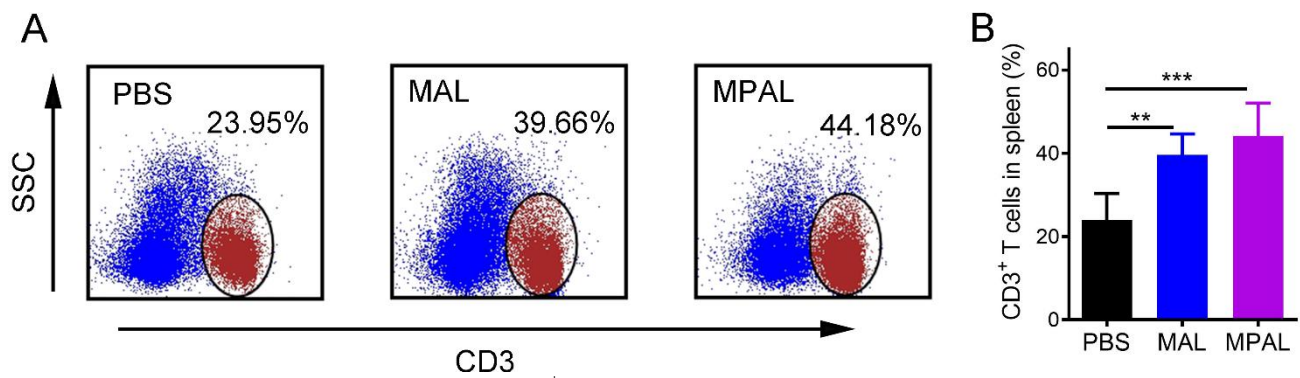

**Figure S14** Flow scatter diagram of CD3<sup>+</sup> T cells (A) and its statistical analysis (B) in spleens. Data are presented as mean±SD (*n* = 3). \*\*\**P*<0.001, \*\**P*<0.01.
